# Supplementary material
Source: Royal Society of Chemistry journal article supplement (doi:10.1039/d6ta01610c)
Supplement: d6ta01610c1.pdf [file d6ta01610c1.pdf]

# Supplementary Materials for

## Improved performance of Li-rich cathode materials by relaxing internal stress and promoting grain growth

Tianzhu Ma<sup>1</sup>, Dongyan Zhang<sup>1, 2, \*</sup>, Yifeng Chen<sup>3</sup>, Maolin Zhang<sup>1, 2</sup>, Yangxi Yan<sup>1, 2</sup>, Zhimin Li<sup>1, 2, \*</sup>, Ri-ich Murakami<sup>4</sup>

<sup>1</sup>*School of Advanced Materials and Nanotechnology, Xidian University, 266 Xinglong Section of Xifeng Road, Xi'an 710126, P.R. China*

<sup>2</sup>*Shaanxi Key Laboratory of High-Orbits-Electron Materials and Protection Technology for Aerospace (HMP), Xidian University, 266 Xinglong Section of Xifeng Road, Xi'an 710126, P.R. China*

<sup>3</sup>*College of Chemical Engineering & Materials, Xuchang University, 88 Bayi Road, Xuchang 46100, P.R. China*

<sup>4</sup>*School of Mechanical Engineering Chengdu University, 2025 Chengluo Avenue, Chengdu 610106, P.R. China*

*\*Corresponding Authors, E-mail addresses:*

[zhangdongyan@xidian.edu.cn](mailto:zhangdongyan@xidian.edu.cn); [zml@mail.xidian.edu.cn](mailto:zml@mail.xidian.edu.cn)

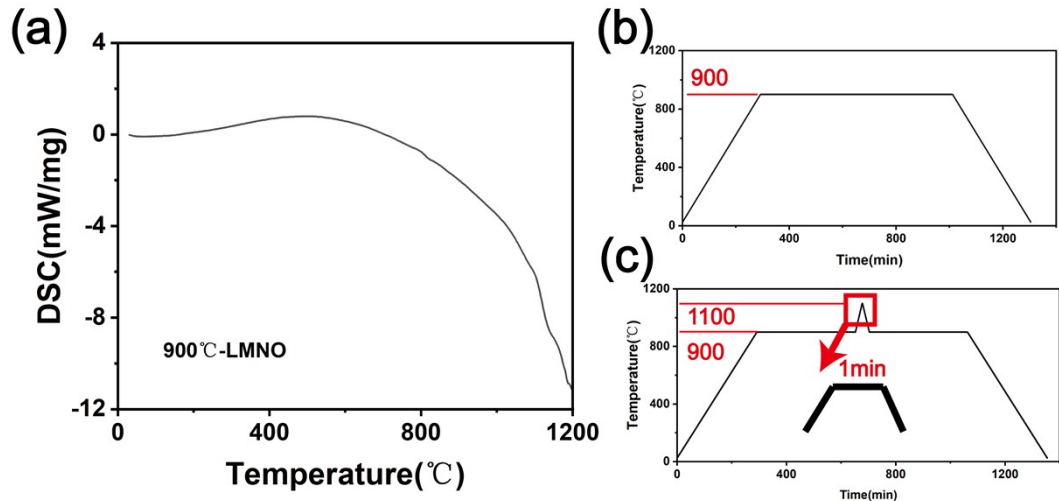

**Figure S1** (a) The DSC curve of LMNO; (b) The schematic diagram of the heat treatment process for 900°C-LMNO and 900°C-Zr0.75%; (c) The schematic diagram of the heat treatment process for 1100°C-Zr0.75%.

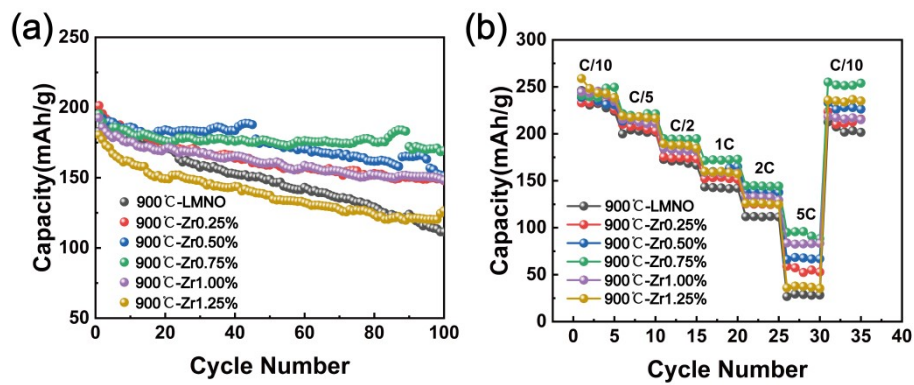

**Figure S2** (a) The cyclic performance and (b) rate capability of Zr doping with different concentrations

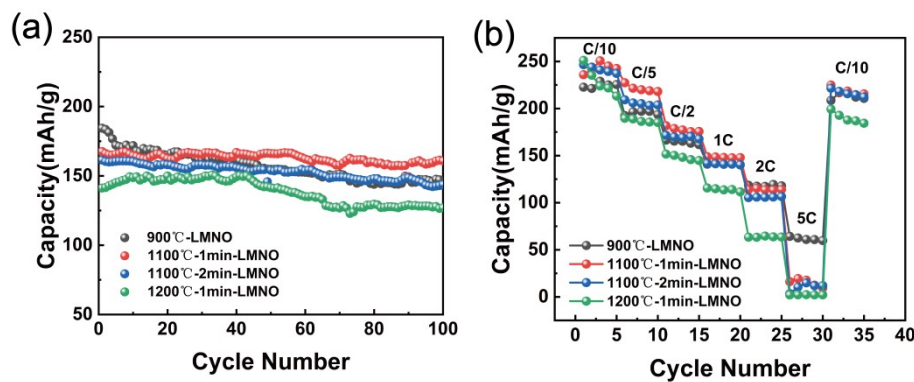

**Figure S3** (a) The cyclic performance and (b) rate capability of LMNO under different thermal shock processes

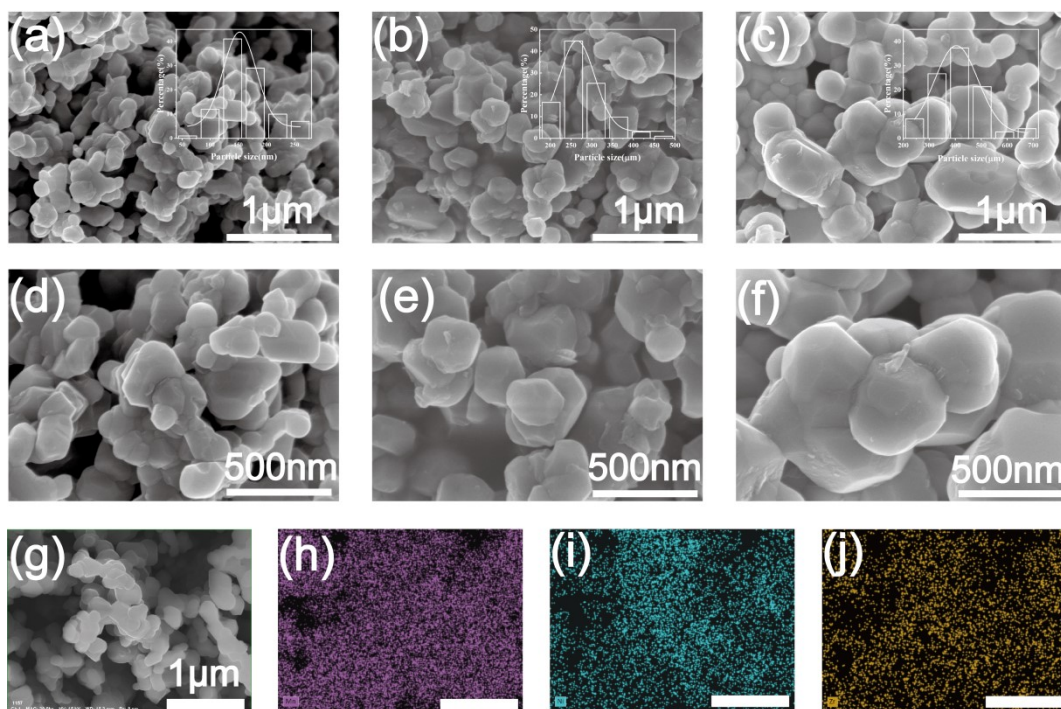

**Figure S4** The SEM image of (a, d) 900°C-LMNO, (b, e) 900°C-Zr0.75% and (c, f) 1100°C-Zr0.75%; (g~j) The EDS image of 1100°C-Zr0.75%.

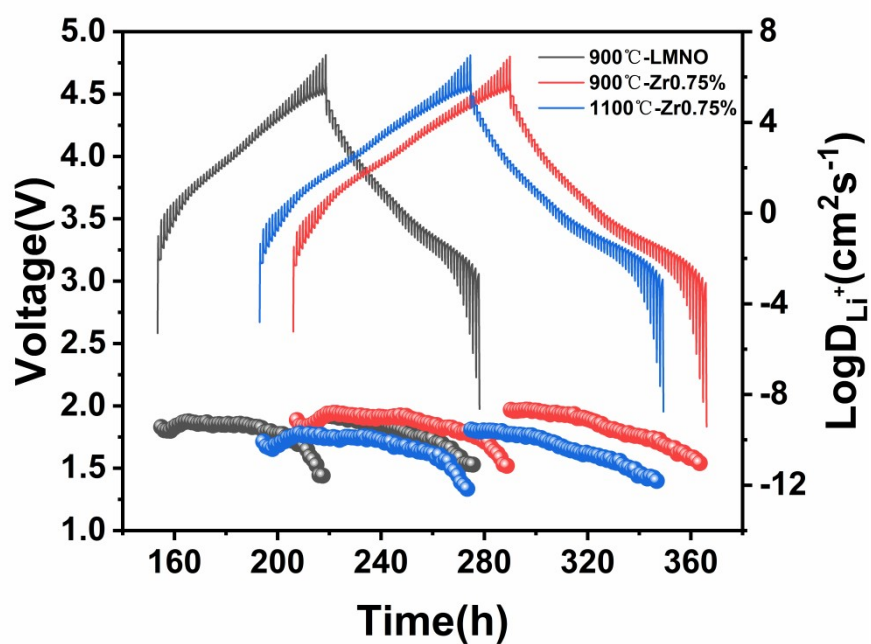

**Figure S5** The gitt results of 900°C-LMNO, 900°C-Zr0.75% and 1100°C-Zr0.75%

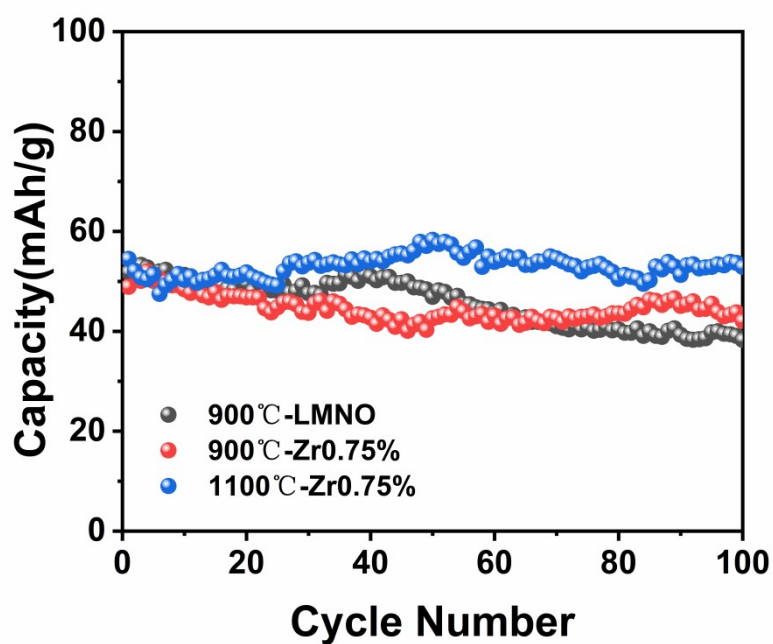

Figure S6 Full-cell testing results of 900°C-LMNO, 900°C-Zr0.75% and 1100°C-Zr0.75%

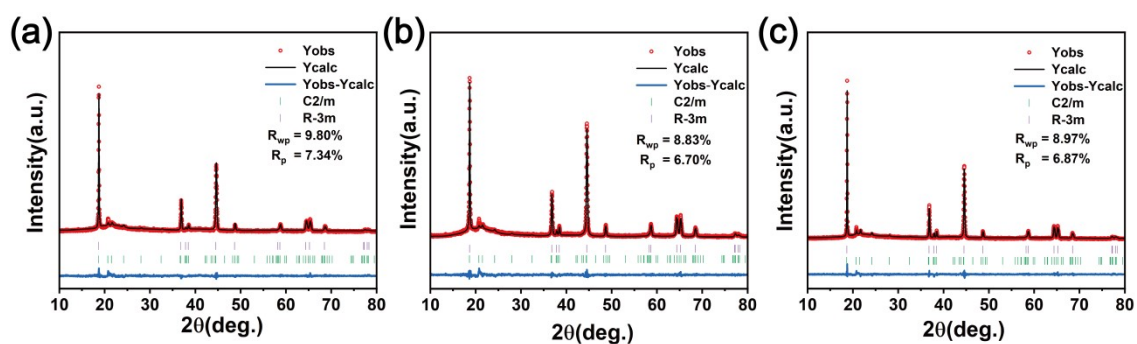

Figure S7 (a~c) The XRD Rietveld refinement results of 900°C-LMNO, 900°C-Zr0.75% and 1100°C-Zr0.75%.

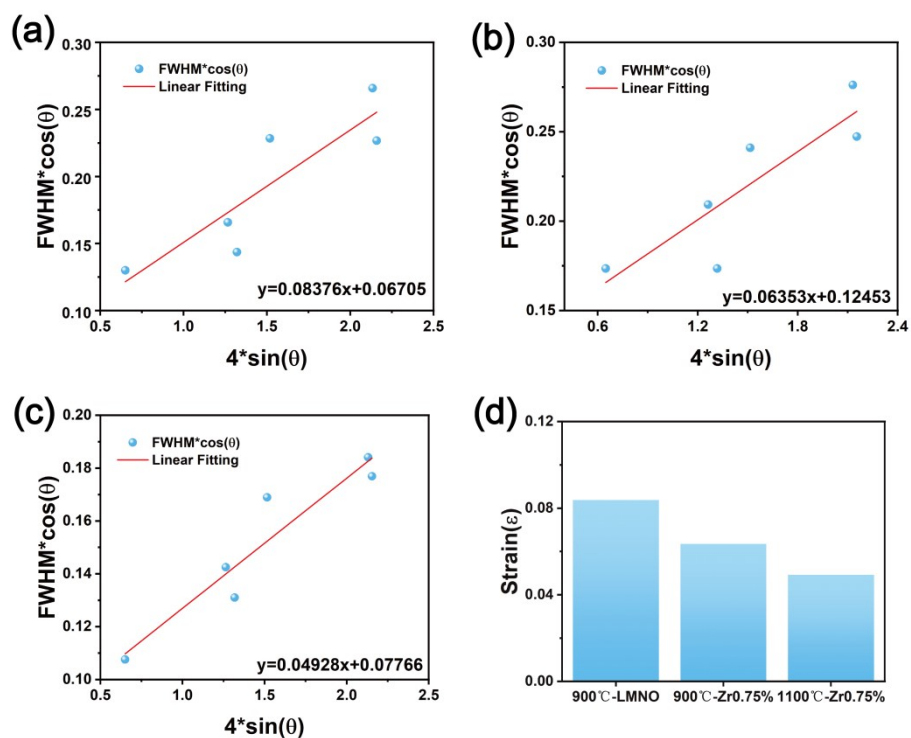

**Figure S8** (a~c) The W-H method fitting results of XRD pattern for 900°C-LMNO, 900°C-Zr0.75%, 1100°C-Zr0.75%; (d) The microscopic strain bar charts of three samples.

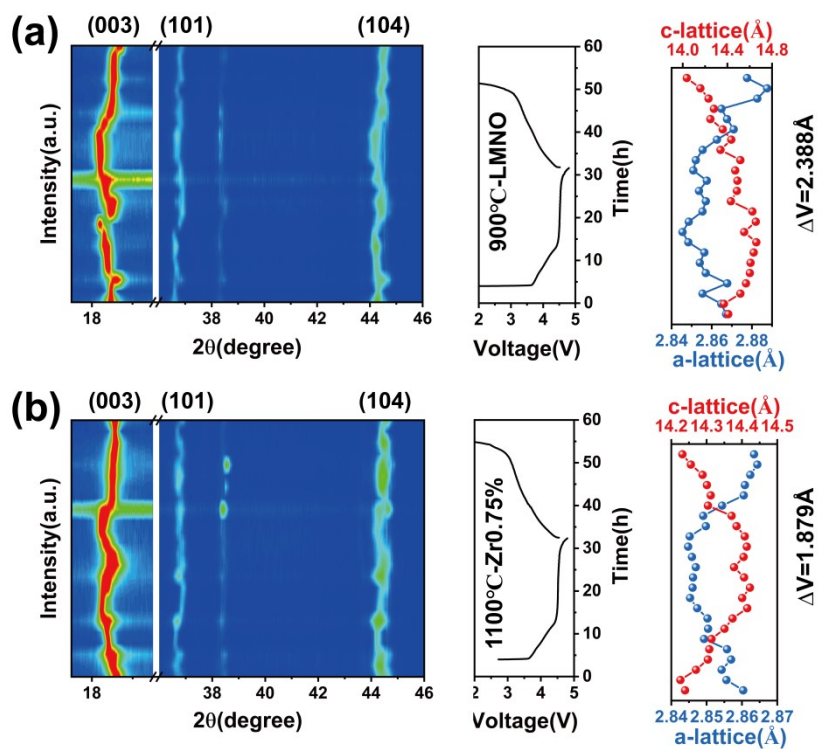

**Figure S9** The ex situ XRD results of (a) 900°C-LMNO and (b) 1100°C-Zr0.75%

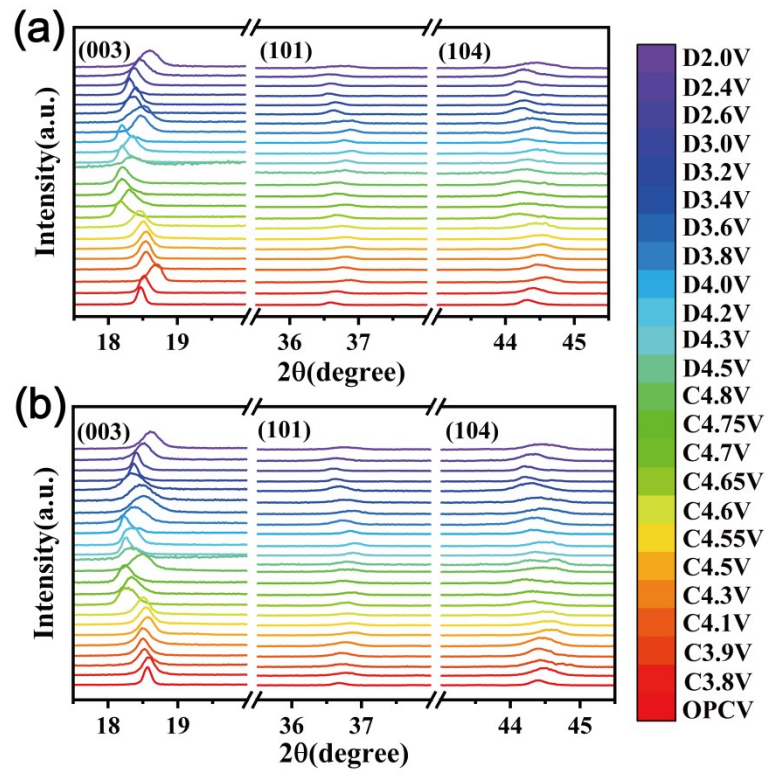

Figure S10 The XRD results of (a) 900°C-LMNO and (b) 1100°C-Zr0.75% at different voltages

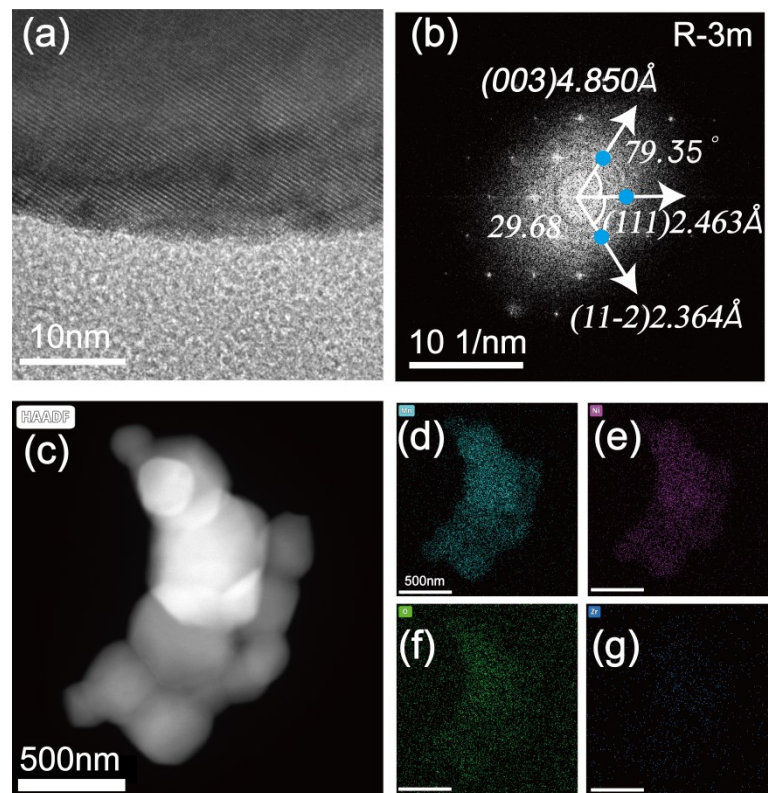

Figure S11 The HRTEM image and mapping result of 1100°C-Zr0.75%.

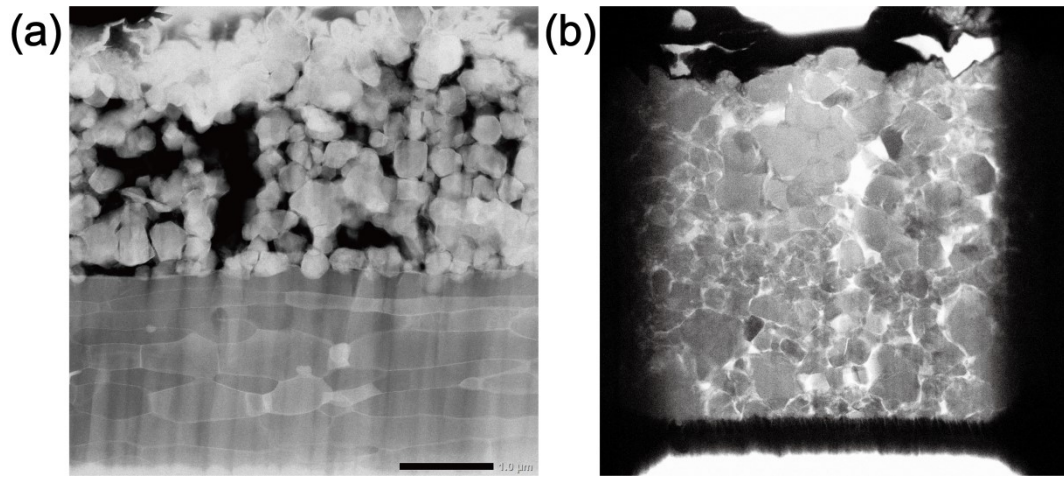

FigureS12 The FIB results of samples

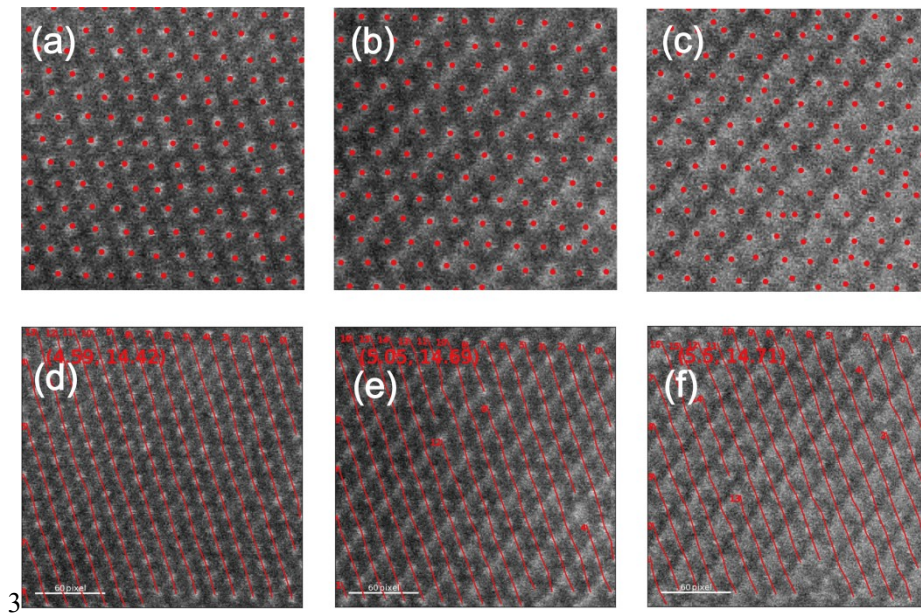

Figure S13 The calibration of atomic columns in different regions

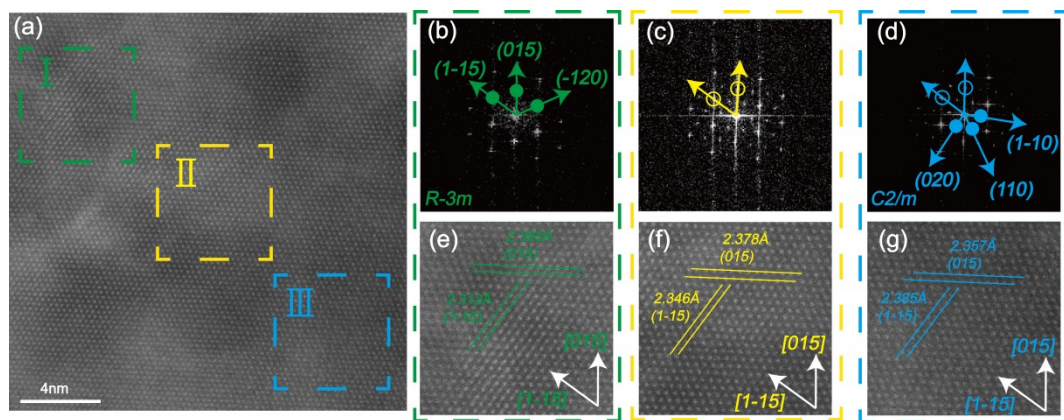

Figure S14 The AC-TEM image of 1100°C-Zr0.75%

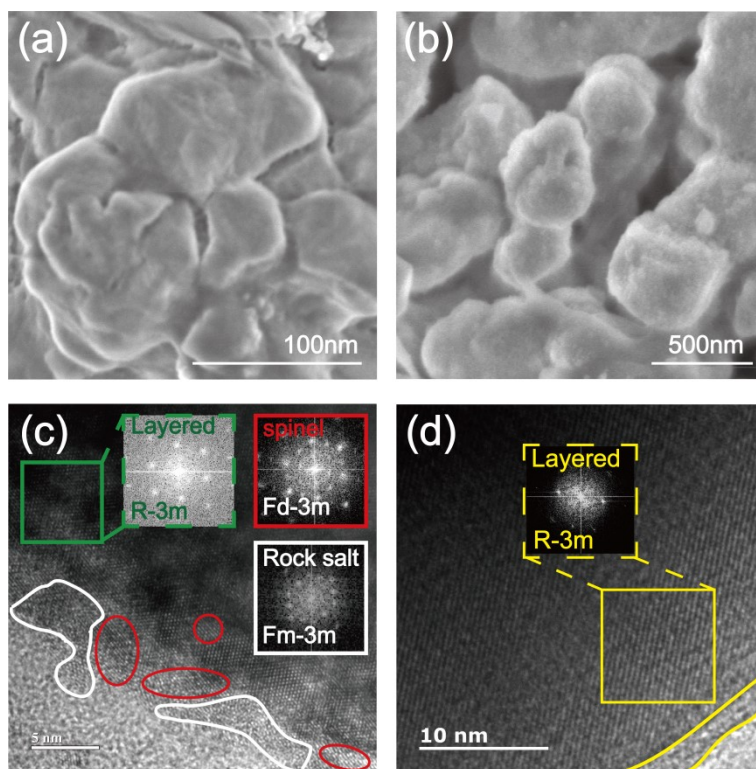

**Figure S15** The SEM and TEM of (a, c) 900°C-LMNO and (b, d) 1100°C-Zr0.75% after cycling

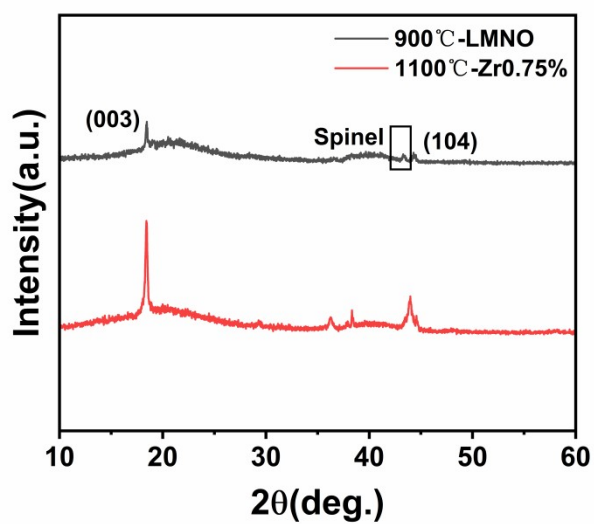

**Figure S16** The XRD of 900°C-LMNO and 1100°C-Zr0.75% after cycling

**Table S1** The electrochemical performance of LMNO with thermal shock

|                  | Initial capacity(mAh/g) | Capacity after cycling(mAh/g) | Capacity retention(%) | 5 C capacity(mAh/g) |
|------------------|-------------------------|-------------------------------|-----------------------|---------------------|
| 900°C-LMNO       | 184.4                   | 144.3                         | 78.3                  | 64.2                |
| 1100°C-1min-LMNO | 167.5                   | 160.8                         | 96.0                  | 19.4                |
| 1100°C-2min-LMNO | 161.4                   | 143.7                         | 89.1                  | 14.9                |
| 1200°C-1min-LMNO | 141.2                   | 127.0                         | 89.9                  | 2.3                 |

**Table S2** The electrochemical performance of LMNO with Zr<sup>4+</sup> doping

|               | Initial capacity(mAh/g) | Capacity after cycling(mAh/g) | Capacity retention(%) | 5 C capacity(mAh/g) |
|---------------|-------------------------|-------------------------------|-----------------------|---------------------|
| 900°C-Zr0.00% | 183.0                   | 111.5                         | 60.9                  | 63.7                |
| 900°C-Zr0.25% | 201.3                   | 147.9                         | 73.5                  | 67.9                |
| 900°C-Zr0.50% | 195.4                   | 151.2                         | 77.4                  | 67.8                |
| 900°C-Zr0.75% | 195.6                   | 169.3                         | 86.6                  | 95.9                |
| 900°C-Zr1.00% | 192.6                   | 148.3                         | 76.9                  | 82.8                |
| 900°C-Zr1.25% | 180.5                   | 126.4                         | 70.0                  | 37.4                |

**Table S3** The ICP result of 900°C-LMNO,900°C-Zr0.75% and 1100°C-Zr0.75%.

| Sample         | The actual molar ratio |             |             |             |
|----------------|------------------------|-------------|-------------|-------------|
|                | Li                     | Mn          | Ni          | Zr          |
| 900°C-LMNO     | 1.204572199            | 0.59575914  | 0.199668661 | /           |
| 900°C-Zr0.75%  | 1.221491846            | 0.578664678 | 0.192407529 | 0.007435947 |
| 1100°C-Zr0.75% | 1.216175614            | 0.585172272 | 0.191314981 | 0.007337133 |

**Table S4** The XRD Rietveld refinement results of 900°C-LMNO,900°C-Zr0.75% and 1100°C-Zr0.75%.

|                 |                 | 900°C-LMNO  | 900°C-Zr0.75% | 1100°C-Zr0.75% |
|-----------------|-----------------|-------------|---------------|----------------|
| Rietveld factor | R <sub>wp</sub> | 9.80%       | 8.83%         | 8.97%          |
|                 | R <sub>p</sub>  | 7.34%       | 6.70%         | 6.87%          |
| Wt%             | R-3m            | 56.88       | 54.782        | 65.985         |
|                 | C2/m            | 43.12       | 45.218        | 34.015         |
| R-3m            | a               | 2.85473     | 2.85966       | 2.863394       |
|                 | b               | 2.85473     | 2.85966       | 2.863394       |
|                 | c               | 14.23096    | 14.252257     | 14.266562      |
|                 | c/a             | 4.985045871 | 4.983899135   | 4.982395716    |
|                 | V               | 100.437     | 100.935       | 101.301        |
| C2/m            | a               | 4.95542     | 4.994078      | 4.965401       |
|                 | b               | 8.55056     | 8.543277      | 8.57469        |
|                 | c               | 5.02225     | 5.038775      | 5.049073       |
|                 | V               | 200.96      | 203.111       | 202.959        |

**Table S5** The W-H method fitting results of 900°C-LMNO.

| No. | $2\theta$ | FWHM    | $4\sin\theta$ | FWHM*cos $\theta$ |
|-----|-----------|---------|---------------|-------------------|
| 1   | 18.71981  | 0.13173 | 0.650542117   | 0.129976175       |
| 2   | 36.89916  | 0.17471 | 1.265880054   | 0.165730345       |
| 3   | 38.54171  | 0.15212 | 1.320137044   | 0.143596557       |
| 4   | 44.61947  | 0.24686 | 1.518453418   | 0.228381352       |
| 5   | 64.49909  | 0.31431 | 2.134431199   | 0.265822044       |
| 6   | 65.34187  | 0.26929 | 2.159253478   | 0.226684209       |

**Table S6** The W-H method fitting results of 900°C-Zr0.75%.

| No. | 2degree  | FWHM    | 4sin        | FWHM*cos    |
|-----|----------|---------|-------------|-------------|
| 1   | 18.65804 | 0.17579 | 0.64841455  | 0.173464955 |
| 2   | 36.80614 | 0.22056 | 1.262799515 | 0.209280363 |
| 3   | 38.43995 | 0.18378 | 1.316783457 | 0.173536408 |
| 4   | 44.51048 | 0.26042 | 1.514933045 | 0.241020239 |
| 5   | 64.36485 | 0.32632 | 2.130466753 | 0.27618308  |
| 6   | 65.18599 | 0.29348 | 2.15467113  | 0.247262259 |

**Table S7** The W-H method fitting results of 1100°C-Zr0.75%.

| No. | 2degree  | FWHM    | 4sin        | FWHM*cos    |
|-----|----------|---------|-------------|-------------|
| 1   | 18.71008 | 0.10901 | 0.650206995 | 0.107560169 |
| 2   | 36.82953 | 0.15019 | 1.263574199 | 0.142499467 |
| 3   | 38.47107 | 0.13878 | 1.317809153 | 0.131032221 |
| 4   | 44.53564 | 0.18253 | 1.515745834 | 0.168917404 |
| 5   | 64.35753 | 0.21754 | 2.130250491 | 0.184123812 |
| 6   | 65.17249 | 0.20997 | 2.154274088 | 0.176916883 |
